# Supplementary material for: Prognostic utility of serum CRP levels in combination with CURB-65 in patients with clinically suspected sepsis: a decision curve analysis
Source: HighWire-hosted journal article supplement (doi:10.1136/bmjopen-2014-007049), 2015-04-01

Supplementary Figures

**Supplementary Figure 1a.** Calibration plot of the CURB-65

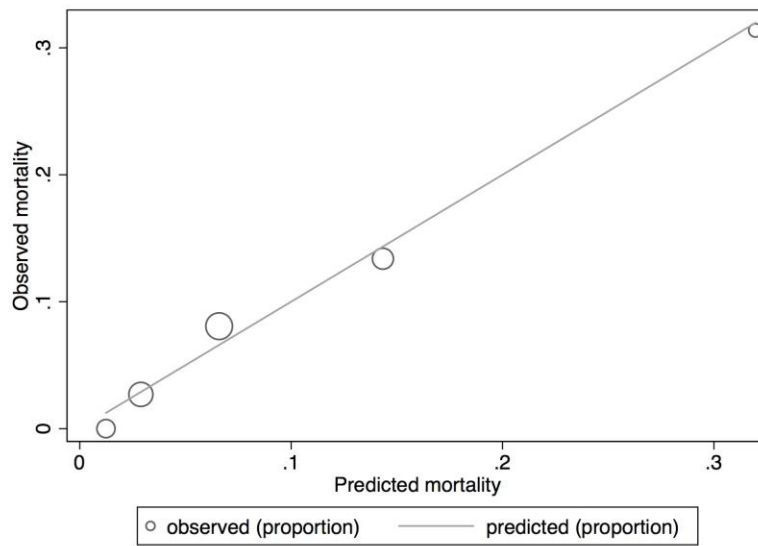

**Supplementary Figure 1b.** Calibration plot of the modified CURB-65

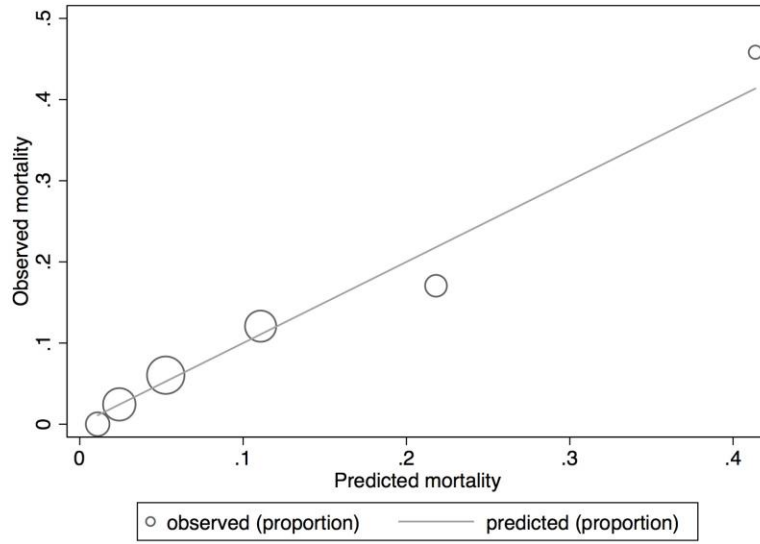

**Supplementary Figure 2.** The receiver operating characteristics curves of the

CURB-65 and the modified CURB-65

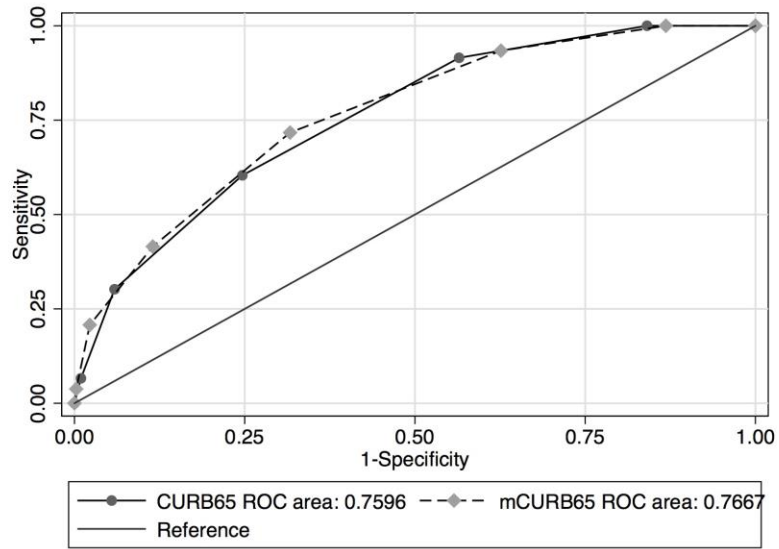

**Supplementary Figure 3.** The relationship between serum CRP level and mortality; locally weighted scatterplot smoothing (Lowess) curve

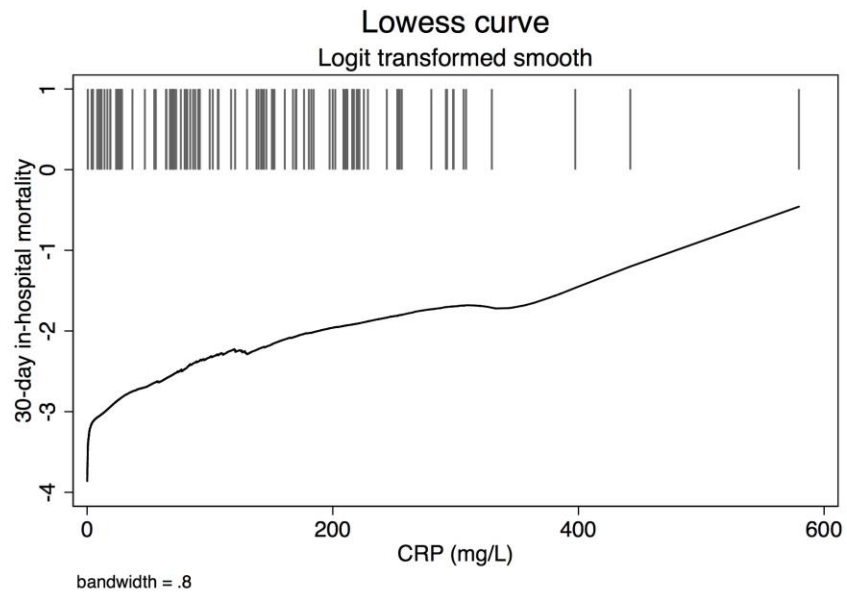

Supplement: bmjopen-2014-007049supp_figures.pdf [file bmjopen-2014-007049supp_figures.pdf]
